# Supplementary material
Source: publisher figshare collection journal article supplement (https://future-science-group.figshare.com/ndownloader/files/30858013)
Supplement: Supplementary file 1 [file 30858013]

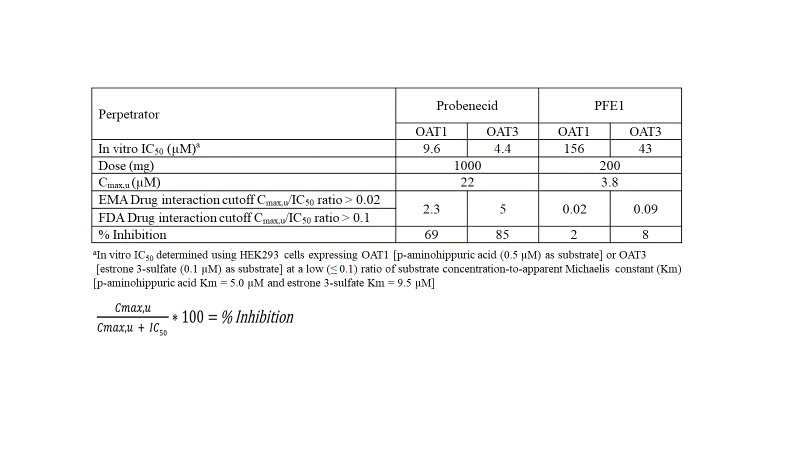


**Supplemental Table 1**. In Vitro DDI potential for OAT1/3 inhibition for Probenecid and Pfizer NCE1.

**Supplemental Table 2**. Standard curve results from three accuracy and precision batches.

**Supplemental Table 3**. Accuracy and precision batch results.

**Supplemental Table 4**. Parallelism results.

**Supplemental Table 5**. Room-temperature and freeze/thaw stability results.
